# Supplementary material
Source: MDPI journal article supplement (https://www.mdpi.com/1996-1073/12/7/1308)
Supplement: s1 [file s1]

## Supplementary Material

# Facile Synthesis of $\text{NiCo}_2\text{O}_4/\text{NiCo}_2\text{O}_4$ Nanofile Arrays Supported on Nickel Foam by a Hydrothermal Method and Their Excellent Performance for High-Rate Supercapacitance

Anil Kumar Yedluri, Eswar Reddy Araveeti and Hee-Je Kim \*

School of Electrical Engineering, Pusan National University, Busandaehak-ro 63beon-gil, Geumjeong-gu, Busan 46241, Korea; yedluri.anil@gmail.com (A.K.Y); easwarreddy.a@gmail.com (E.R.A)

\* Correspondence: heeje@pusan.ac.kr Tel.: +82-10-2295-0613; Fax: +82-51-513-0212

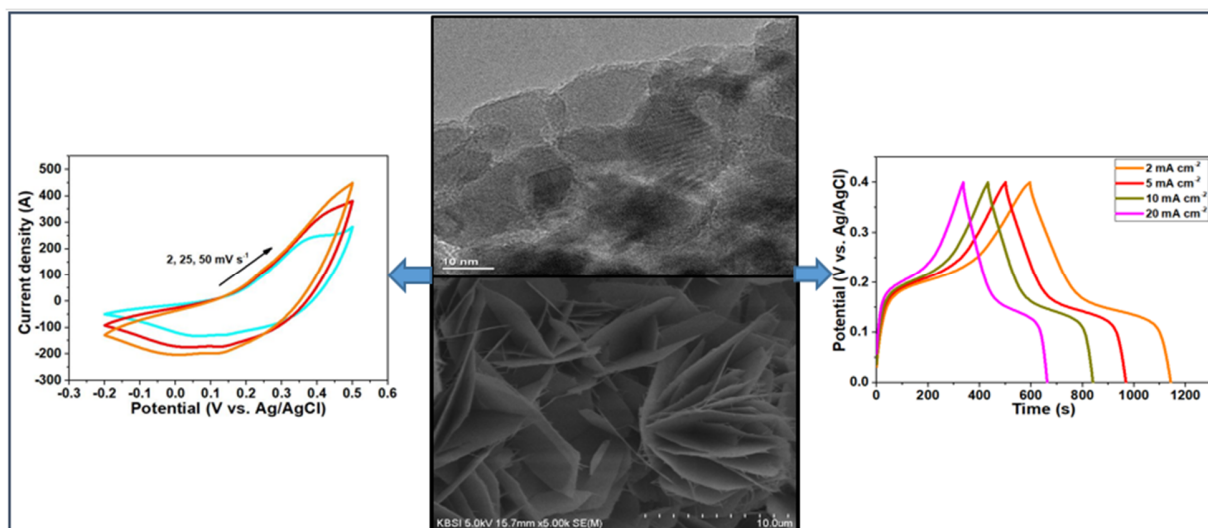

Figure S1. Schematic illustration of NF@NCO/NCO NFAs.
